# Supplementary material for: Influence of Asphaltene Modification on Structure of P3HT/Asphaltene Blends: Molecular Dynamics Simulations
Source: MDPI journal article supplement (doi:10.3390/nano12162867), 2022-08-20
Supplement: s1 [file s1]

# Influence of Asphaltene Modification on Structure of P3HT/Asphaltene Blends: Molecular Dynamics Simulations

Natalia Borzdun <sup>1</sup>, Artyom Glova <sup>1</sup>, Sergey Larin <sup>1,2,\*</sup> and Sergey Lyulin <sup>1</sup>

<sup>1</sup> Institute of Macromolecular Compounds, Russian Academy of Sciences, Bolshoi pr. 31 (V.O.), 199004 St. Petersburg, Russia

<sup>2</sup> Faculty of Physics, St. Petersburg State University, Ulyanovskaya str. 1–3, Peterhof, 198504 St. Petersburg, Russia

\* Correspondence: selarin@macro.ru

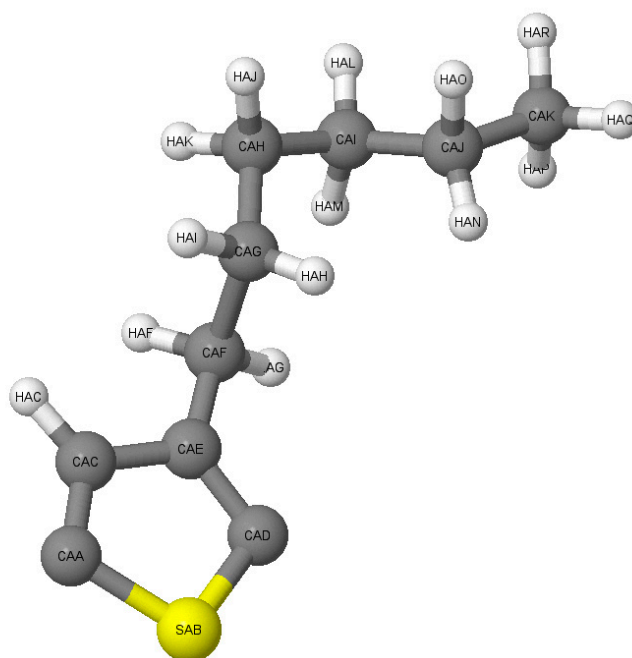

**Figure S1.** Structure of the P3HT monomer unit. Atom names are shown for each particle.

**Table S1.** GAFF atom types and partial charges of a P3HT monomer unit.

| Atom name | GAFF atom type | Partial charge | Atom name | GAFF atom type | Partial charge | Atom name | GAFF atom type | Partial charge |
|-----------|----------------|----------------|-----------|----------------|----------------|-----------|----------------|----------------|
| HAP       | hc             | 0.0328         | CAI       | c3             | -0.0781        | HAG       | hc             | 0.0548         |
| HAQ       | hc             | 0.0328         | HAM       | hc             | 0.0398         | CAF       | c3             | -0.0220        |
| HAR       | hc             | 0.0328         | HAK       | hc             | 0.0408         | HAF       | hc             | 0.0548         |
| CAK       | c3             | -0.0928        | CAH       | c3             | -0.0791        | CAE       | cc             | -0.0780        |
| HAO       | hc             | 0.0378         | HAI       | hc             | 0.0423         | CAC       | cc             | -0.1540        |
| CAJ       | c3             | -0.0791        | CAG       | c3             | -0.0741        | HAC       | ha             | 0.1580         |
| HAN       | hc             | 0.0378         | HAI       | hc             | 0.0423         | CAA       | cd             | -0.0250        |
| HAL       | hc             | 0.0398         |           |                |                | SAB       | ss             | 0.0363         |
|           |                |                |           |                |                | CAD       | cd             | -0.0420        |

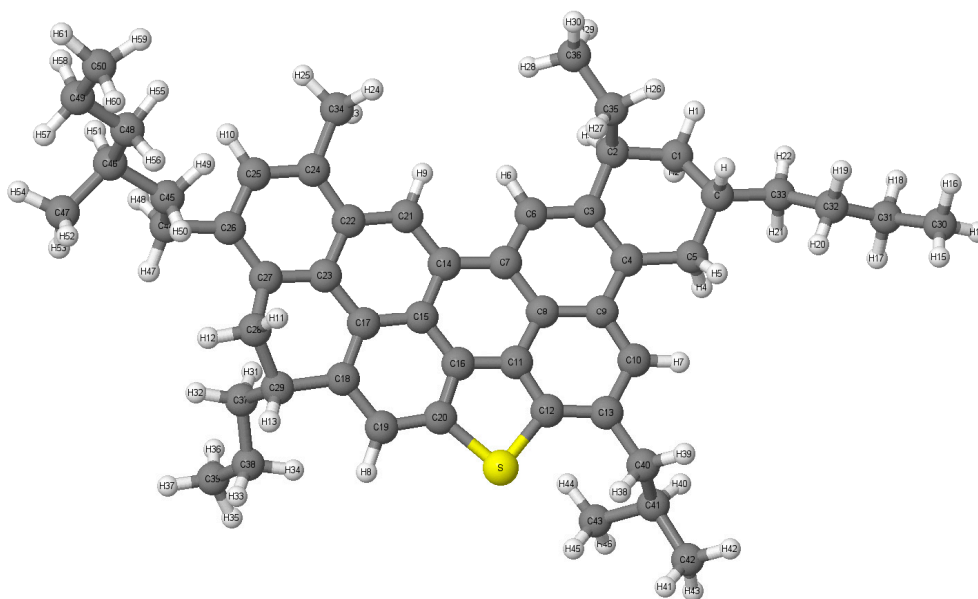

**Figure S2.** Structure of the asphaltene with aliphatic side groups (Asp). Atom names are shown for each particle.

**Table S2.** GAFF atom types and partial charges of the asphaltene with aliphatic side groups (Asp).

| Atom name | GAFF atom type | Partial charge | Atom name | GAFF atom type | Partial charge | Atom name | GAFF atom type | Partial charge |
|-----------|----------------|----------------|-----------|----------------|----------------|-----------|----------------|----------------|
| C         | c3             | -0.0617        | C27       | ca             | -0.0643        | H36       | hc             | 0.034033       |
| H         | hc             | 0.0547         | C28       | c3             | -0.0331        | H37       | hc             | 0.034033       |
| C1        | c3             | -0.0694        | H11       | hc             | 0.0577         | C40       | c3             | -0.0371        |
| H1        | hc             | 0.0447         | H12       | hc             | 0.0577         | H38       | hc             | 0.0517         |
| H2        | hc             | 0.0447         | C29       | c3             | -0.0174        | H39       | hc             | 0.0517         |
| C2        | c3             | -0.0184        | H13       | hc             | 0.0647         | C41       | c3             | -0.0627        |
| H3        | hc             | 0.0577         | C30       | c3             | -0.0931        | H40       | hc             | 0.0487         |
| C3        | ca             | -0.0713        | H14       | hc             | 0.0330         | C42       | c3             | -0.0926        |
| C4        | ca             | -0.0593        | H15       | hc             | 0.0330         | H41       | hc             | 0.0362         |
| C5        | c3             | -0.0341        | H16       | hc             | 0.0330         | H42       | hc             | 0.0362         |
| H4        | hc             | 0.0522         | C31       | c3             | -0.0804        | H43       | hc             | 0.0362         |
| H5        | hc             | 0.0522         | H17       | hc             | 0.0382         | C43       | c3             | -0.0926        |
| C6        | ca             | -0.1060        | H18       | hc             | 0.0382         | H44       | hc             | 0.0362         |
| H6        | ha             | 0.1350         | C32       | c3             | -0.0804        | H45       | hc             | 0.0362         |
| C7        | ca             | -0.0160        | H19       | hc             | 0.0417         | H46       | hc             | 0.0362         |
| C8        | ca             | 0.0030         | H20       | hc             | 0.0417         | C44       | c3             | -0.0371        |
| C9        | ca             | -0.0170        | C33       | c3             | -0.0764        | H47       | hc             | 0.0487         |
| C10       | ca             | -0.1150        | H21       | hc             | 0.0402         | H48       | hc             | 0.0487         |
| H7        | ha             | 0.1340         | H22       | hc             | 0.0402         | C45       | c3             | -0.0764        |
| C11       | ca             | -0.0570        | C34       | c3             | -0.0558        | H49       | hc             | 0.0467         |
| C12       | ca             | -0.0441        | H23       | hc             | 0.0450         | H50       | hc             | 0.0467         |
| C13       | ca             | -0.0283        | H24       | hc             | 0.0450         | C46       | c3             | -0.0667        |
| C14       | ca             | -0.0090        | H25       | hc             | 0.0450         | H51       | hc             | 0.0477         |

| Atom name | GAFF atom type | Partial charge | Atom name | GAFF atom type | Partial charge | Atom name | GAFF atom type | Partial charge |
|-----------|----------------|----------------|-----------|----------------|----------------|-----------|----------------|----------------|
| C15       | ca             | 0.0110         | C35       | c3             | -0.0774        | C47       | c3             | -0.0901        |
| C16       | ca             | -0.0640        | H26       | hc             | 0.0427         | H52       | hc             | 0.034367       |
| C17       | ca             | -0.0200        | H27       | hc             | 0.0427         | H53       | hc             | 0.034367       |
| C18       | ca             | -0.0463        | C36       | c3             | -0.0941        | H54       | hc             | 0.034367       |
| C19       | ca             | -0.0900        | H28       | hc             | 0.034367       | C48       | c3             | -0.0774        |
| H8        | ha             | 0.1370         | H29       | hc             | 0.034367       | H55       | hc             | 0.0397         |
| C20       | ca             | -0.0451        | H30       | hc             | 0.034367       | H56       | hc             | 0.0397         |
| C21       | ca             | -0.1030        | C37       | c3             | -0.0774        | C49       | c3             | -0.0804        |
| H9        | ha             | 0.1340         | H31       | hc             | 0.0457         | H57       | hc             | 0.0397         |
| C22       | ca             | -0.0310        | H32       | hc             | 0.0457         | H58       | hc             | 0.0397         |
| C23       | ca             | -0.0120        | C38       | c3             | -0.0824        | C50       | c3             | -0.0931        |
| C24       | ca             | -0.0663        | H33       | hc             | 0.0407         | H59       | hc             | 0.0327         |
| C25       | ca             | -0.1250        | H34       | hc             | 0.0407         | H60       | hc             | 0.0327         |
| H10       | ha             | 0.1310         | C39       | c3             | -0.0941        | H61       | hc             | 0.0327         |
| C26       | ca             | -0.0673        | H35       | hc             | 0.034033       | S         | ss             | 0.0322         |

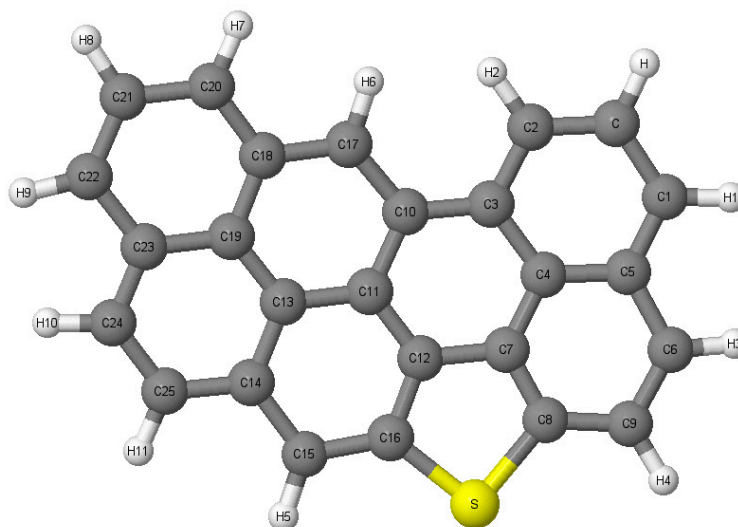

**Figure S3.** Structure of the asphaltene with aliphatic side groups cut off (Asp-Core). Atom names are shown for each particle.

**Table S3.** GAFF atom types and partial charges of the asphaltene with aliphatic side groups cut off (Asp-Core).

| Atom name | GAFF atom type | Partial charge | Atom name | GAFF atom type | Partial charge | Atom name | GAFF atom type | Partial charge |
|-----------|----------------|----------------|-----------|----------------|----------------|-----------|----------------|----------------|
| C         | ca             | -0.1310        | C9        | ca             | -0.0850        | C19       | ca             | -0.0130        |
| H         | ha             | 0.1330         | H4        | ha             | 0.1390         | C20       | ca             | -0.1110        |
| C1        | ca             | -0.1070        | C10       | ca             | -0.0090        | H7        | ha             | 0.1340         |
| H1        | ha             | 0.1350         | C11       | ca             | 0.0100         | C21       | ca             | -0.1290        |
| C2        | ca             | -0.1100        | C12       | ca             | -0.0580        | H8        | ha             | 0.1340         |
| H2        | ha             | 0.1330         | C13       | ca             | -0.0170        | C22       | ca             | -0.1090        |
| C3        | ca             | -0.0140        | C14       | ca             | -0.0230        | H9        | ha             | 0.1350         |
| C4        | ca             | 0.0070         | C15       | ca             | -0.0730        | C23       | ca             | -0.0340        |
| C5        | ca             | -0.0360        | H5        | ha             | 0.1430         | C24       | ca             | -0.1110        |
| C6        | ca             | -0.1080        | C16       | ca             | -0.0351        | H10       | ha             | 0.1340         |
| H3        | ha             | 0.1340         | C17       | ca             | -0.0980        | C25       | ca             | -0.1160        |
| C7        | ca             | -0.0630        | H6        | ha             | 0.1350         | H11       | ha             | 0.1340         |
| C8        | ca             | -0.0371        | C18       | ca             | -0.0330        | S         | ss             | 0.0202         |

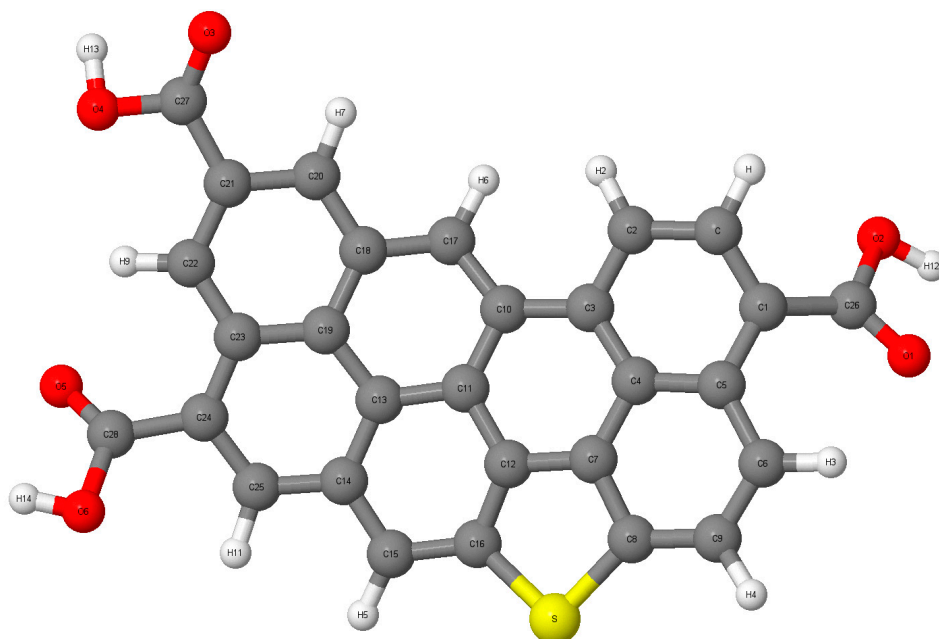

**Figure S4.** Structure of the modified asphaltene with carboxyl groups (Asp-COOH). Atom names are shown for each particle.

**Table S4.** GAFF atom types and partial charges of the modified asphaltene with carboxyl groups (Asp-COOH).

| Atom name | GAFF atom type | Partial charge | Atom name | GAFF atom type | Partial charge | Atom name | GAFF atom type | Partial charge |
|-----------|----------------|----------------|-----------|----------------|----------------|-----------|----------------|----------------|
| C         | ca             | -0.065000      | C12       | ca             | -0.048000      | C24       | ca             | -0.106600      |
| H         | ha             | 0.159000       | C13       | ca             | -0.014000      | C25       | ca             | -0.034000      |
| C1        | ca             | -0.111600      | C14       | ca             | -0.044000      | H11       | ha             | 0.159000       |
| C2        | ca             | -0.131000      | C15       | ca             | -0.054000      | S         | ss             | 0.052200       |
| H2        | ha             | 0.144000       | H5        | ha             | 0.147000       | C26       | c              | 0.649702       |
| C3        | ca             | 0.021000       | C16       | ca             | -0.044100      | O1        | o              | -0.550001      |
| C4        | ca             | -0.006000      | C17       | ca             | -0.076000      | O2        | oh             | -0.604101      |
| C5        | ca             | 0.014000       | H6        | ha             | 0.143000       | H12       | ho             | 0.448000       |
| C6        | ca             | -0.104000      | C18       | ca             | -0.056000      | C27       | c              | 0.650702       |
| H3        | ha             | 0.161000       | C19       | ca             | 0.013000       | O3        | o              | -0.554001      |
| C7        | ca             | -0.067000      | C20       | ca             | -0.049000      | O4        | oh             | -0.597101      |
| C8        | ca             | -0.039100      | H7        | ha             | 0.162000       | H13       | ho             | 0.449000       |
| C9        | ca             | -0.079000      | C21       | ca             | -0.132600      | C28       | c              | 0.650702       |
| H4        | ha             | 0.145000       | C22       | ca             | -0.045000      | O5        | o              | -0.545001      |
| C10       | ca             | -0.024000      | H9        | ha             | 0.192000       | O6        | oh             | -0.612101      |
| C11       | ca             | 0.014000       | C23       | ca             | -0.032000      | H14       | ho             | 0.450000       |

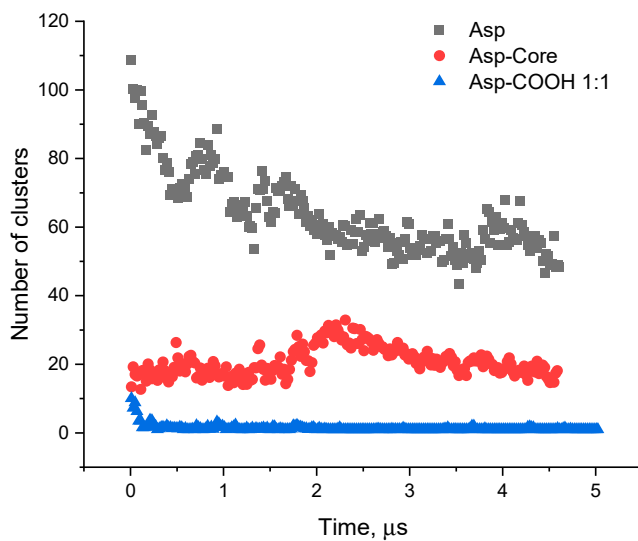

**Figure S5.** Number of asphaltene clusters in the studied blends (P3HT/Asp, P3HT/Asp-Core, P3HT/Asp-COOH at a concentration of 1:1) as a function of time.

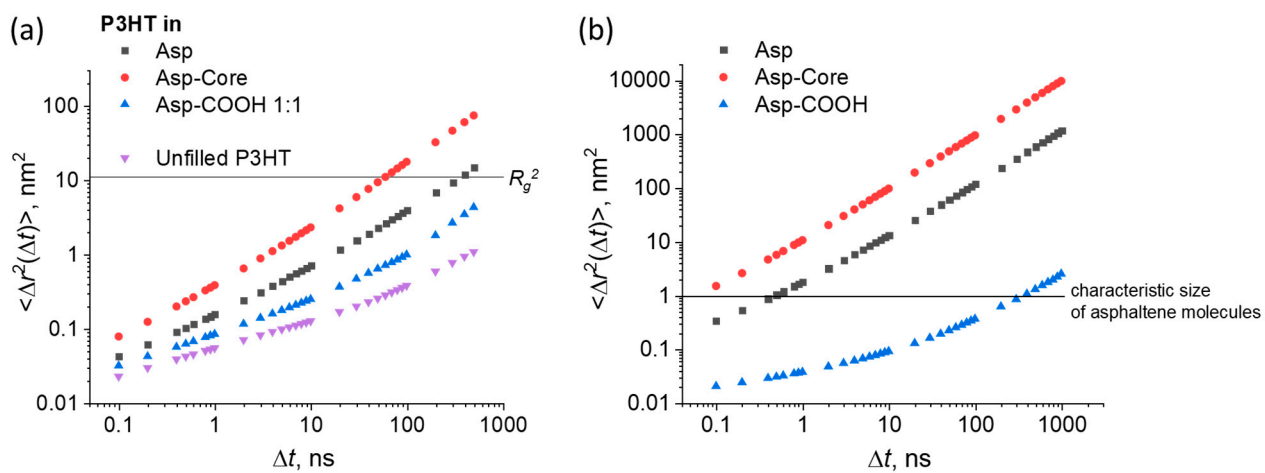

**Figure S6.** Mean-squared displacements of the centers of mass of (a) the P3HT chains and (b) the asphaltenes in the studied systems. Horizontal lines represent the squared gyration radius of P3HT and characteristic sizes of the asphaltene molecules.

### Asphaltene phase density profiles

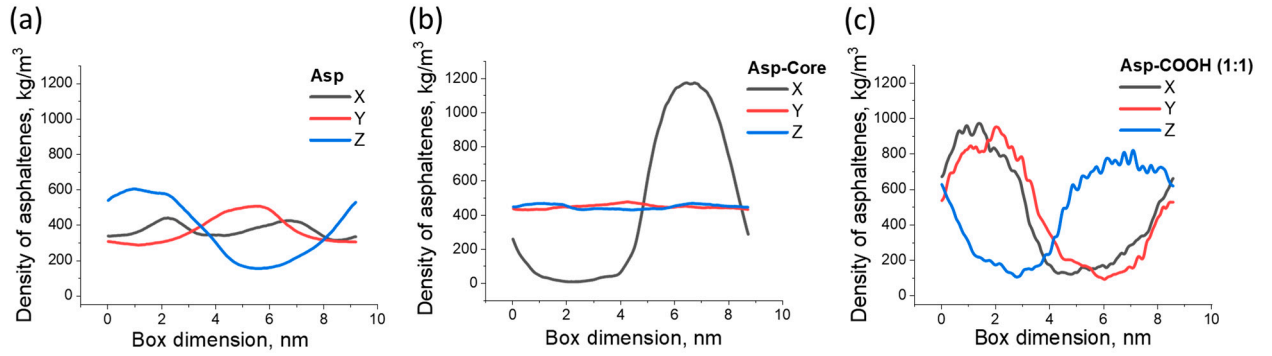

**Figure S7.1.** Density profiles of the asphaltene phase along the X, Y and Z axes obtained for the following blends by averaging over the last 100 ns of simulations: (a) P3HT/Asp, (b) P3HT/Asp-Core and (c) P3HT/Asp-COOH (at a concentration of 1:1).

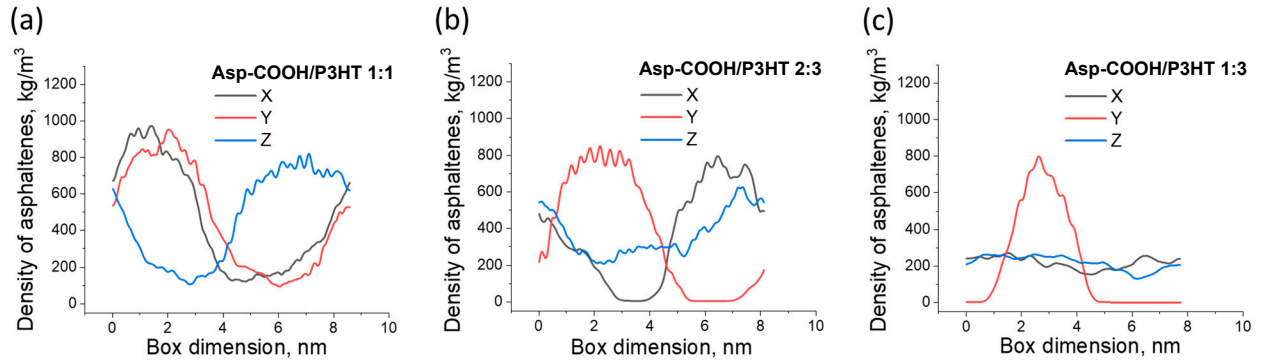

**Figure S7.2.** Density profiles of the asphaltene phase along the X, Y and Z axes obtained by averaging over the last 100 ns of simulations of Asp-COOH/P3HT blends at concentrations equal to: (a) 1:1, (b) 2:3 and (c) 1:3.

### Calculation of solubility parameter $\delta$

The solubility parameter  $\delta$  was calculated using the following formula:<sup>1</sup>

$$\delta_i = \sqrt{\frac{E_{coh}}{V_m}},$$

where  $\frac{E_{coh}}{V_m}$  is the cohesive energy density,  $E_{coh}$  is the intermolecular interaction energy,  $V_m$  is the system molar volume.

$E_{coh}$  in turn is defined as follows:<sup>2</sup>

$$E_{coh} = \sum_N E_{is} - E_{tot},$$



where  $N$  is the number of polymer chains,  $E_{is}$  is the potential energy of individual chains,  $E_{tot}$  is the total potential energy of the system.

The potential energy of an individual chain  $E_{is}$  was obtained as follows. First, the MD trajectories were converted into separate trajectories corresponding to the individual chain in a simulation box using the GROMACS *gmx mdun -rerun* routine. Then, the time dependencies of the potential energies of isolated chains  $E_{is}$  and the total potential energy of the system were evaluated with the aid of the *gmx energy* routine. As a result, the time dependencies of  $E_{coh}$  and the solubility parameter  $\delta$  were obtained, according to the equations above.

#### Hydrogen bonding

We utilized the GROMACS *gmx hbond* routine to calculate the average number of hydrogen bonds in the P3HT/Asp-COOH blend. The value obtained for the last 100 ns of 5  $\mu$ s long simulation was equal to 1.9 hydrogen bonds per Asp-COOH molecule.

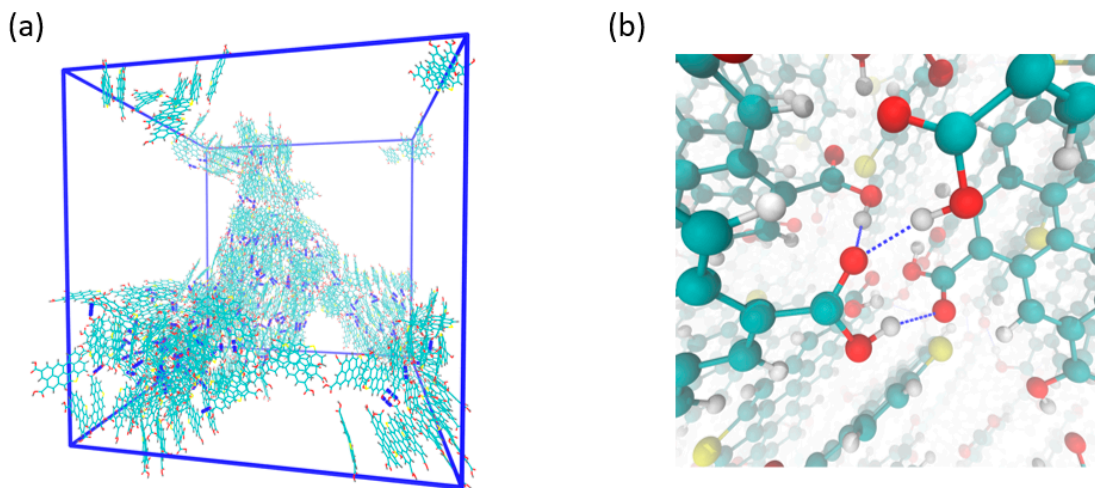

**Figure S8.** (a) Typical snapshot of the Asp-COOH phase obtained at the end of the 5  $\mu$ s long simulation. Hydrogen bonds are represented as blue lines. (b) Close-up view of the possible pathways for the formation of hydrogen bonds between carboxyl groups of the asphaltenes from one stack and from adjacent stacks. Carbon, oxygen and hydrogen atoms are represented in cyan, red and light-gray, respectively.

#### Calculation of intermolecular pair correlation function $g(r)$

Intermolecular pair correlation function  $g(r)$  between the atoms in the polyaromatic cores of the asphaltene molecules (carbon and sulfur) was calculated using the following equation:<sup>3</sup>

$$g(r) = \frac{\langle \rho(r) \rangle}{\langle \rho \rangle_{local}} = \frac{1}{\langle \rho \rangle_{local}} \frac{1}{N} \sum_{i=1}^N \frac{\delta(r_i - r)}{4\pi r^2},$$

Here,  $\langle \rho(r) \rangle$  is the average number density of the asphaltene atoms at the distance  $r$  from the given asphaltene atoms;  $\langle \rho \rangle_{local}$  is the average number density of the asphaltenes in the system;  $N$  is the number of asphaltenes;  $r_i$  is the distance between the pair of asphaltenes, and  $\delta$  is the Kronecker delta.

*P3HT fragment wrapping around the asphaltene cluster*

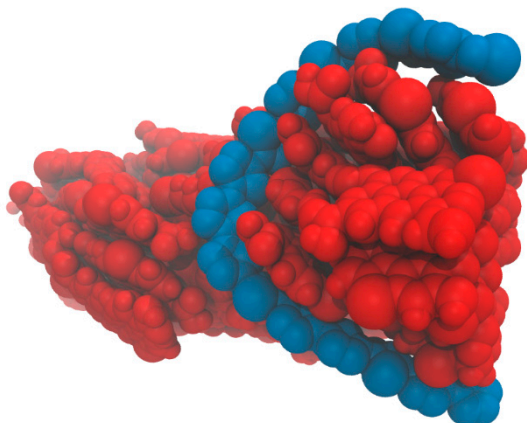

**Figure S9.** Typical snapshot of a fragment of the P3HT chain backbone wrapped around an Asp-COOH cluster obtained after 5  $\mu$ s long simulation run for the system with lowest concentration of asphaltenes (Asp-COOH/P3HT 1:3).

## References

- (1) Thomas, S.; Grohens, Y.; Jyotishkumar, P. *Characterization of Polymer Blends*; Thomas, S., Grohens, Y., Jyotishkumar, P., Eds.; Wiley-VCH Verlag GmbH & Co. KGaA: Weinheim, Germany, **2014**; Vol. 9783527331. <https://doi.org/10.1002/9783527645602>.
- (2) Belmares, M.; Blanco, M.; Goddard, W. A.; Ross, R. B.; Caldwell, G.; Chou, S. H.; Pham, J.; Olofson, P. M.; Thomas, C. Hildebrand and Hansen Solubility Parameters from Molecular Dynamics with Applications to Electronic Nose Polymer Sensors. *J. Comput. Chem.* **2004**, 25 (15), 1814–1826. <https://doi.org/10.1002/JCC.20098>.
- (3) Larin, S. V.; Falkovich, S. G.; Nazarychev, V. M.; Gurtovenko, A. a.; Lyulin, A. V.; Lyulin, S. V. Molecular-Dynamics Simulation of Polyimide Matrix Pre-Crystallization near the Surface of a Single-Walled Carbon Nanotube. *RSC Adv.* **2014**, 4 (2), 830. <https://doi.org/10.1039/c3ra45010d>.
